# Supplementary material for: Prognostic and Immunological Potential of Ribonucleotide Reductase Subunits in Liver Cancer
Source: Hindawi journal article supplement (doi:10.1155/2023/3878796), 2023-01-20
Supplement: f1 [file 3878796.f1.zip]

# CERTIFICATE OF LANGUAGE EDITING

The English writing of the following manuscript was carefully edited by a native English speaker.

## Manuscript Information

---

|                                       |                                                                                                                                                                                                                                                                                       |
|---------------------------------------|---------------------------------------------------------------------------------------------------------------------------------------------------------------------------------------------------------------------------------------------------------------------------------------|
| ID                                    | LE202210240433                                                                                                                                                                                                                                                                        |
| Editing date                          | 2022-10-27                                                                                                                                                                                                                                                                            |
| Title                                 | Identification of ribonucleotide reductase subunits as independent prognostic and chemosensitivity implications in liver cancer                                                                                                                                                       |
| Corresponding author                  | Senxiang Yan                                                                                                                                                                                                                                                                          |
| Language writing before editing       | <input type="checkbox"/> Very poor <input type="checkbox"/> Poor <input type="checkbox"/> Fair <input checked="" type="checkbox"/> Good <input type="checkbox"/> Very good <input type="checkbox"/> Excellent                                                                         |
| Recommendation after language editing | <input type="checkbox"/> Submitting to target journal directly<br><input checked="" type="checkbox"/> Submitting to target journal after minor revision<br><input type="checkbox"/> Re-editing required after major revision<br><input type="checkbox"/> Not suitable for publication |

Overview  
comments

Thank you for using Editorbar service! The manuscript was written with good command of English. However, there are minor changes in the grammar and sentence constructions which have been changed. Moreover, it would be better if the author provides abstract and materials and methods for better understanding. Please make appropriate corrections and can be submitted to the journal. Thank you!

**Edited by**

---

**Prajakta T.**

Senior Editor

Queen's University Belfast

Language Editing

**Certificate Issued by**

---

**Dr. Jason Qee**

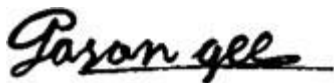

Editor in Chief

Editorbar Language Editing, Beijing, China

[runse@editorbar.com](mailto:runse@editorbar.com) [www.editorbar.com](http://www.editorbar.com)

---

Certificate link: [www.editorbar.com/order/cert/LE202210240433](http://www.editorbar.com/order/cert/LE202210240433)
