# Supplementary material for: Prognostic and Immunological Potential of Ribonucleotide Reductase Subunits in Liver Cancer
Source: Oxid Med Cell Longev. 2023 Jan 20;2023:3878796. doi: 10.1155/2023/3878796 (PMC9883104; doi:10.1155/2023/3878796)
Supplement: Supplementary Materials — These supplementary materials include four supplemental figures and one certificate of language editing of the manuscript. Figure S1 shows the expression of RRM1, RRM2, and RRM2B in various types of cancer. Figure S2 shows the protein expression of RRM1, RRM2, and RRM2B and the receiver operating characteristic curve for the diagnosis of liver cancer based on RRM1, RRM2, and RRM2B. Figure S3 shows the time-dependent receiver operating characteristic curve for prognosis of liver cancer based on RRM1, RRM2, and RRM2B. Figure S4 shows the correlation analysis of RR subunits with potential chemosensitivity. [file 3878796.f1.zip]

Archive with 2 entries (2 files):
- language editing.pdf
- SI_revised.docx
